# Supplementary material
Source: HighWire-hosted journal article supplement (https://www.mcponline.org/content/suppl/2015/12/11/M115.052860)
Supplement: mcp.M115.052860-2.pdf [file mcp.M115.052860-2.pdf]

# A computational pipeline to generate and analyze proBAM files

September 28, 2015

## Contents

|          |                                                                   |           |
|----------|-------------------------------------------------------------------|-----------|
| <b>1</b> | <b>Introduction</b>                                               | <b>1</b>  |
| <b>2</b> | <b>Building proBAM files using R package <i>proBAMr</i></b>       | <b>2</b>  |
| 2.1      | Preparing annotation files . . . . .                              | 2         |
| 2.2      | Preparing PSMs table . . . . .                                    | 3         |
| 2.3      | Generate SAM file using <i>PSMtab2SAM</i> . . . . .               | 4         |
| 2.4      | Convert SAM file to BAM and index . . . . .                       | 5         |
| 2.5      | Visualize proteomics data in IGV . . . . .                        | 6         |
| <b>3</b> | <b>Analyzing proBAM files using R package <i>proBAMtools</i></b>  | <b>6</b>  |
| 3.1      | Proteomics data interpretation . . . . .                          | 7         |
| 3.1.1    | Summarize proteomics identifications from a proBAM file . . . . . | 7         |
| 3.1.2    | Sequence coverage analysis of proteomics data . . . . .           | 10        |
| 3.2      | Proteomics data assembly . . . . .                                | 10        |
| 3.2.1    | Parsimony . . . . .                                               | 10        |
| 3.2.2    | Generate spectra count table for proteomics data . . . . .        | 13        |
| 3.3      | Proteomics data integration . . . . .                             | 14        |
| 3.3.1    | Switch annotation . . . . .                                       | 14        |
| 3.3.2    | Multiple data sets integration . . . . .                          | 17        |
| <b>4</b> | <b>Session Information</b>                                        | <b>17</b> |

## 1 Introduction

Recent advances of sequencing technologies have reformed our conception of genomic data analysis, storage and interpretation, instigating more research interest in exploring human proteome at a parallel scale. Shotgun proteomics holds this promise by surveying proteome both qualitatively and quantitatively. Over the last years large amount of proteomics data has been accumulated, an emerging demand is to combine these efforts to catalogue the wide dynamic range of protein expression and complexity of alternative isoforms. However, this task is daunting due to the fact that different studies use varying databases, search engines and assembly tools. Such a challenge calls for an efficient approach of integrating data from different proteomics studies and even with genomic data.

Here we provide a computational pipeline, that maps identified PSMs to the genome in BAM format, a binary format for efficient data storage and fast access in genomic research field. This method differs from other approaches because of its ability of building connections between peptide and genomic location and simultaneously maintaining spectra count information. PSMs are aligned under the same coordination framework regardless of the annotation systems (e.g. RefSeq, ENSEMBL) of the input proteomics data, which enables flexible protein assembly switch between different annotation or at different level (gene or protein). When genomic/transcriptomic information of the same individual is available, this approach allows the co-analysis with -omics data together. In Figure 1, we illustrated the pipeline for generating and analyzing proBAM files. This document provides a step by step tutorial using examples.

Figure 1: A computational pipeline to generate and analyze proBAM files

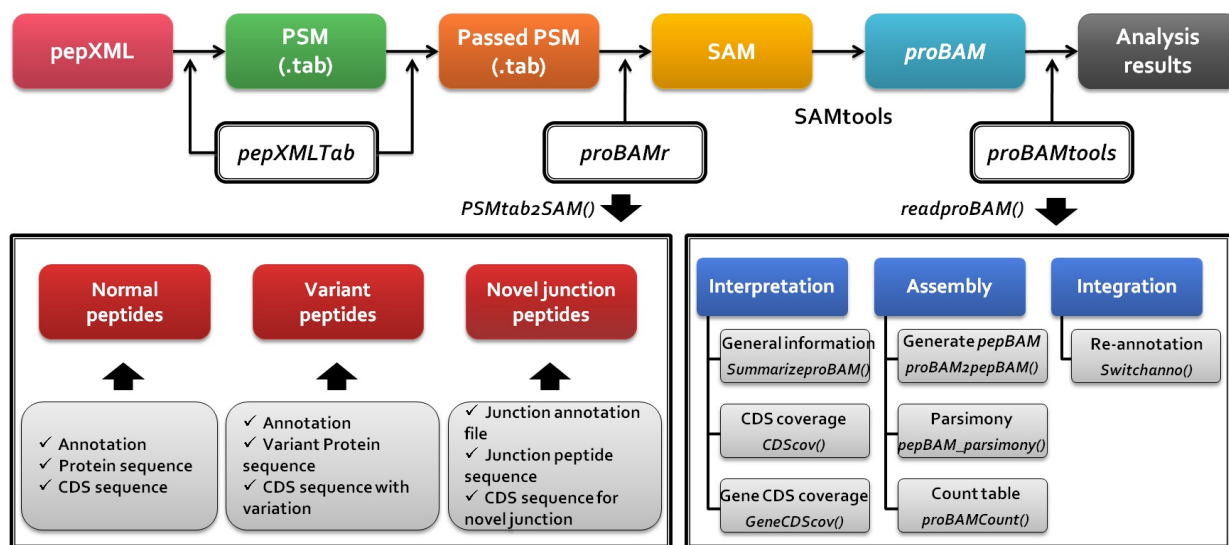

## 2 Building proBAM files using R package *proBAMr*

### 2.1 Preparing annotation files

To map proteomics data to the genome, numerous pieces of genome annotation information are needed, such as genome elements region boundary, protein coding sequence and protein sequence et al. It is possible to manually download these data from different public resources (e.g. NCBI, UCSC and ENSEMBL) and then parse them to an appropriate format. To make this process more efficient and autonomous, we provide functions to prepare the gene/transcript annotation files from UCSC, ENSEMBL and GENCODE. The `PrepareAnnotationRefseq` and `PrepareAnnotationEnsembl` were included in another R package *customProDB* <http://bioconductor.org/packages/3.0/bioc/html/customProDB.html>. Here, we provide the function `PrepareAnnotationGENCODE` to prepare the annotation from GENCODE. This function requires users to download GTF file, coding sequence and protein sequence FASTA files from GENCODE ftp <ftp://ftp.sanger.ac.uk/pub/>

gencode/Gencode\_human/. Users should use the same version of annotations through the same project analysis. All the annotations are saved to a specified directory for latter use.

```
> library(proBAMr)

> gtfFile <- system.file("extdata", "test.gtf", package="proBAMr")
> CDSfasta <- system.file("extdata", "coding_seq.fasta", package="proBAMr")
> pepfasta <- system.file("extdata", "pro_seq.fasta", package="proBAMr")
> annotation_path <- tempdir()
> PrepareAnnotationGENCODE(gtfFile, CDSfasta, pepfasta,
+                           annotation_path, dbsnp=NULL,
+                           splice_matrix=FALSE, COSMIC=FALSE)
```

## 2.2 Preparing PSMs table

After preparing all the annotation files, the R package *pepXMLTab* is used to extract confident PSMs and related information from pepXML files. Other tools are also applicable at this step, as long as it generates similar tabular files, as shown below.

```
> passedPSM <- read.table(system.file("extdata", "passedPSM.tab",
+   package="proBAMr"), sep='\t', header=TRUE)
> passedPSM[1:3, ]
```

|   |                                                                                                | spectrum              |                 |                    |        |
|---|------------------------------------------------------------------------------------------------|-----------------------|-----------------|--------------------|--------|
| 1 | 00463_H12_P003361_B00L_A00_R1.9484.9484.2                                                      |                       |                 |                    |        |
| 2 | 00463_H12_P003361_B00L_A00_R1.9501.9501.2                                                      |                       |                 |                    |        |
| 3 | 00463_H12_P003361_B00L_A00_R1.9526.9526.2                                                      |                       |                 |                    |        |
|   |                                                                                                | spectrumNativeID      | start_scan      | end_scan           |        |
| 1 | controllerType=0 controllerNumber=1 scan=9484                                                  |                       | 9484            | 9484               |        |
| 2 | controllerType=0 controllerNumber=1 scan=9501                                                  |                       | 9501            | 9501               |        |
| 3 | controllerType=0 controllerNumber=1 scan=9526                                                  |                       | 9526            | 9526               |        |
|   | precursor_neutral_mass                                                                         | assumed_charge        | index           | retention_time_sec |        |
| 1 | 1945.011                                                                                       | 2                     | 1604            | 5941.112           |        |
| 2 | 1945.019                                                                                       | 2                     | 1614            | 5951.951           |        |
| 3 | 1945.016                                                                                       | 2                     | 1631            | 5963.760           |        |
|   | hit_rank                                                                                       | peptide               | peptide_prev_aa | peptide_next_aa    |        |
| 1 | 1                                                                                              | VNPTVFFDIAVDGEPLGR    | M               | V                  |        |
| 2 | 1                                                                                              | VNPTVFFDIAVDGEPLGR    | M               | V                  |        |
| 3 | 1                                                                                              | VNPTVFFDIAVDGEPLGR    | M               | V                  |        |
|   |                                                                                                |                       |                 |                    | protei |
| 1 | ENST00000415933.1 ENSG00000196262.9 OTTHUMG00000023687.5 OTTHUMT00000341788.1 PPIA-007 PPIA 12 |                       |                 |                    |        |
| 2 | ENST00000415933.1 ENSG00000196262.9 OTTHUMG00000023687.5 OTTHUMT00000341788.1 PPIA-007 PPIA 12 |                       |                 |                    |        |
| 3 | ENST00000415933.1 ENSG00000196262.9 OTTHUMG00000023687.5 OTTHUMT00000341788.1 PPIA-007 PPIA 12 |                       |                 |                    |        |
|   | num_tot_proteins                                                                               | calc_neutral_pep_mass | massdiff        | num_tol_term       |        |
| 1 | 4                                                                                              | 1944.995              | -0.01667663     | 2                  |        |
| 2 | 4                                                                                              | 1944.995              | -0.02461120     | 2                  |        |

```

3           4           1944.995 -0.02192565           2
  num_missed_cleavages num_matched_ions tot_num_ions      mvh
1           0           21           31 46.20442
2           0           26           31 60.50605
3           0           22           31 52.51659
  mzFidelity  xcorr modification NTT
1  81.97849 4.276119      <NA> 1
2  104.25397 5.334539      <NA> 1
3   86.18693 5.057394      <NA> 1

```

### 2.3 Generate SAM file using PSMtab2SAM

The function PSMtab2SAM first finds the peptide location in protein sequences, then maps the coding sequence of the peptide back to the genome according to the annotation.

```

> load(system.file("extdata/GENCODE", "exon_anno.RData", package="proBAMr"))
> load(system.file("extdata/GENCODE", "proseq.RData", package="proBAMr"))
> load(system.file("extdata/GENCODE", "procodingseq.RData", package="proBAMr"))
> options(stringsAsFactors=FALSE)
> passedPSM <- read.table(system.file("extdata", "passedPSM.tab",
+   package="proBAMr"), sep='\t', header=TRUE)
> outfile <- paste(tempdir(), '/test.sam', sep='')
> PSMtab2SAM(passedPSM, XScolumn='mvh', exon, proteinseq,
+   procodingseq, outfile)
> SAM <- read.table(file=outfile, sep='\t')
> dim(SAM)

```

```
[1] 40 21
```

```
> SAM[20:27, ]
```

```

           V1 V2   V3           V4 V5
20 00463_H12_P003361_B00L_A00_R1.0.1.7307 16 chr11 65622810 255
21 00463_H12_P003361_B00L_A00_R1.0.1.7350 0  chr7  44839340 255
22 00463_H12_P003361_B00L_A00_R1.0.1.7441 0  chr7  44836381 255
23 00463_H12_P003361_B00L_A00_R1.0.1.7457 0  chr7  44836381 255
24 00463_H12_P003361_B00L_A00_R1.0.1.7898 16  chr5 133509648 255
25 00463_H12_P003361_B00L_A00_R1.0.1.7915 16  chr5 133509648 255
26 00463_H12_P003361_B00L_A00_R1.0.1.7933 16  chr5 133509648 255
27 00463_H12_P003361_B00L_A00_R1.0.1.7952 16  chr1  26230237 255
           V6 V7 V8 V9
20           42M * 0 0
21           45M * 0 0
22 12M2453N24M * 0 0
23 12M2453N24M * 0 0
24           51M * 0 0

```

```

25          51M * 0 0
26          51M * 0 0
27          39M * 0 0

                                V10 V11  V12
20          CAAAGGCTTGCCCTCCAGGGAGATGACGGCACTGCCCCCAG * XA:Z:0
21          TCCATCTATGGGGAGAAATTTGAAGATGAGAACTTCATCCTAAAG * XA:Z:0
22          GTCTCCTTTGAGCTGTTTGCAGACAAGGTCCCAAAG * XA:Z:0
23          GTCTCCTTTGAGCTGTTTGCAGACAAGGTCCCAAAG * XA:Z:0
24 TTTGGCAATTTCCACATCAACTTCAAATATCTCTCCATCAGAACTCTGCAA * XA:Z:0
25 TTTGGCAATTTCCACATCAACTTCAAATATCTCTCCATCAGAACTCTGCAA * XA:Z:0
26 TTTGGCAATTTCCACATCAACTTCAAATATCTCTCCATCAGAACTCTGCAA * XA:Z:0
27          CCGAGGGCTGAGAATCAGCTCAAAAAGCCTGGCCTGAGGC * XA:Z:0
      V13  V14          V15  V16          V17  V18
20 NH:i:1 XL:i:1  XP:Z:LGGSAVISLEGKPL XC:i:2 XS:f:30.6722 XM:Z:-
21 NH:i:1 XL:i:1  XP:Z:SIYGEKFEDENFILK XC:i:2 XS:f:22.4909 XM:Z:-
22 NH:i:1 XL:i:1  XP:Z:VSFELFADKVPK XC:i:2 XS:f:21.321 XM:Z:-
23 NH:i:1 XL:i:1  XP:Z:VSFELFADKVPK XC:i:2 XS:f:25.2581 XM:Z:-
24 NH:i:1 XL:i:1  XP:Z:LQSSDGEIFEVDVEIAK XC:i:2 XS:f:30.9829 XM:Z:-
25 NH:i:1 XL:i:1  XP:Z:LQSSDGEIFEVDVEIAK XC:i:2 XS:f:42.8235 XM:Z:-
26 NH:i:1 XL:i:1  XP:Z:LQSSDGEIFEVDVEIAK XC:i:2 XS:f:33.9951 XM:Z:-
27 NH:i:1 XL:i:1  XP:Z:ASGQAFELILSPR XC:i:2 XS:f:23.4655 XM:Z:-
      V19  V20  V21
20 XN:i:0 XT:i:2 XG:Z:N
21 XN:i:1 XT:i:2 XG:Z:N
22 XN:i:1 XT:i:2 XG:Z:N
23 XN:i:1 XT:i:2 XG:Z:N
24 XN:i:0 XT:i:2 XG:Z:N
25 XN:i:0 XT:i:2 XG:Z:N
26 XN:i:0 XT:i:2 XG:Z:N
27 XN:i:0 XT:i:2 XG:Z:N

```

## 2.4 Convert SAM file to BAM and index

Add the header to the SAM file. Converted them to the binary BAM files using samtools <http://samtools.sourceforge.net/>. Sort and index them for fast access.

The bullet list below summarizes the steps after the SAM file been generated.

```

> paste('cat header test.sam > test_header.sam')

[1] "cat header test.sam > test_header.sam"

> paste('samtools view -S -b test_header.sam > test_header.bam')

[1] "samtools view -S -b test_header.sam > test_header.bam"

> paste('samtools sort test_header.bam > test_header_sort')

```

```
[1] "samtools sort test_header.bam > test_header_sort"
```

```
> paste('samtools index test_header_sort')
```

```
[1] "samtools index test_header_sort"
```

## 2.5 Visualize proteomics data in IGV

The proBAM files can be visualized in IGV directly. Furthermore, users can co-visualize their proteomics data with the paired genomics/transcriptomics data, as shown in Fig 2.

Figure 2: IGV snapshot of a homozygous mutation in gene ALDH1B1 in both proteomics and RNA-Seq data (inside read box)

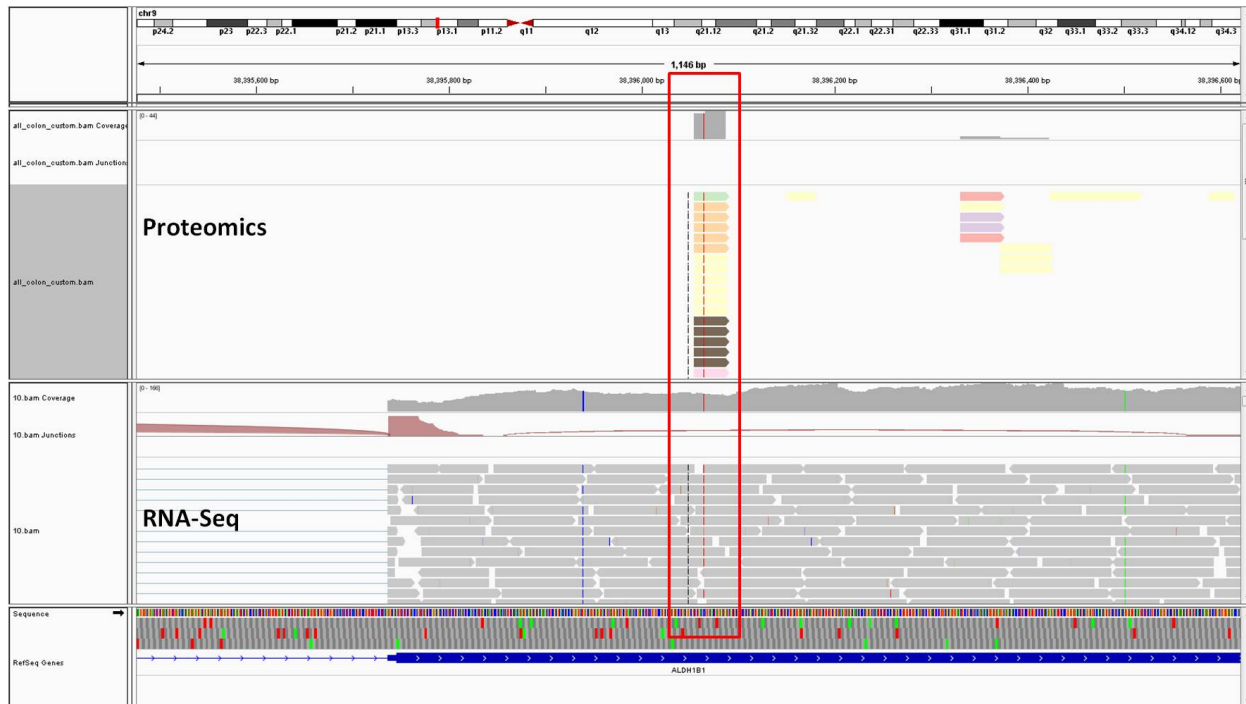

## 3 Analyzing proBAM files using R package *proBAMtools*

This R package, *proBAMtools*, is designed to perform various analyses based on the proBAM files, including tools for proteomics data interpretation, assembly, and integration. This document provides a step by step tutorial using a toy genome, which only contains two genes.

### 3.1 Proteomics data interpretation

#### 3.1.1 Summarize proteomics identifications from a proBAM file

The function `SummarizeproBAM` is used to summarize the proteomics identifications from a proBAM file. In addition to the number of identifiable spectra, PSMs and unique peptide, it is easy to identify genomic regions from which the peptides are derived with the genomic sequence mapping information available in the proBAM files. The function calculates the number of peptides mapped to unique or multiple genomic locations. And for peptides mapped to unique genomic locations, the function also provides the number of within exon peptides and exon-exon junction peptides.

```
> library(proBAMtools)

> proBAMFile <- system.file("extdata", "test.bam", package="proBAMtools")
> glan_proBAM <- readproBAM(proBAMFile)
> glan_proBAM
```

GAlignments object with 146 alignments and 15 metadata columns:

|       | seqnames  | strand    | cigar        | qwidth                                | start     | end       |  |  |
|-------|-----------|-----------|--------------|---------------------------------------|-----------|-----------|--|--|
|       | <Rle>     | <Rle>     | <character>  | <integer>                             | <integer> | <integer> |  |  |
| [1]   | chr12     | +         | 27M          | 27                                    | 25357166  | 25357192  |  |  |
| [2]   | chr12     | +         | 27M          | 27                                    | 25357166  | 25357192  |  |  |
| [3]   | chr12     | +         | 27M          | 27                                    | 25357166  | 25357192  |  |  |
| [4]   | chr12     | +         | 27M          | 27                                    | 25357166  | 25357192  |  |  |
| [5]   | chr12     | +         | 27M          | 27                                    | 25357166  | 25357192  |  |  |
| ...   | ...       | ...       | ...          | ...                                   | ...       | ...       |  |  |
| [142] | chr12     | -         | 12M17861N18M | 30                                    | 25380335  | 25398225  |  |  |
| [143] | chr12     | -         | 12M17861N18M | 30                                    | 25380335  | 25398225  |  |  |
| [144] | chr12     | -         | 54M          | 54                                    | 25398262  | 25398315  |  |  |
| [145] | chr12     | -         | 33M          | 33                                    | 25398271  | 25398303  |  |  |
| [146] | chr12     | -         | 33M          | 33                                    | 25398271  | 25398303  |  |  |
|       | width     | njunc     |              |                                       |           |           |  |  |
|       | <integer> | <integer> |              |                                       |           |           |  |  |
| [1]   | 27        | 0         |              |                                       |           |           |  |  |
| [2]   | 27        | 0         |              |                                       |           |           |  |  |
| [3]   | 27        | 0         |              |                                       |           |           |  |  |
| [4]   | 27        | 0         |              |                                       |           |           |  |  |
| [5]   | 27        | 0         |              |                                       |           |           |  |  |
| ...   | ...       | ...       | ...          |                                       |           |           |  |  |
| [142] | 17891     | 1         |              |                                       |           |           |  |  |
| [143] | 17891     | 1         |              |                                       |           |           |  |  |
| [144] | 54        | 0         |              |                                       |           |           |  |  |
| [145] | 33        | 0         |              |                                       |           |           |  |  |
| [146] | 33        | 0         |              |                                       |           |           |  |  |
|       |           |           |              | qname                                 | flag      |           |  |  |
|       |           |           |              | <character>                           | <integer> |           |  |  |
| [1]   |           |           |              | klc_100908x_PH_P10_DLD_1_A12.0.1.8807 | 0         |           |  |  |

|       |                                                    |     |
|-------|----------------------------------------------------|-----|
| [2]   | mam_072308x_PH_P8_HCT_116_B12.0.1.7396             | 0   |
| [3]   | klc_070108x_PH_P7_HCT_15_C12_080712110959.0.1.7206 | 0   |
| [4]   | klc_080408x_PH_P8_HT_29_E12.0.1.7619               | 0   |
| [5]   | klc_080408x_PH_P8_LS174_T_F12.0.1.7883             | 0   |
| ...   | ...                                                | ... |
| [142] | klc_090308x_PH_P7a_SW480_J05.0.1.3992              | 16  |
| [143] | klc_090308x_PH_P7a_SW480_J05.0.1.4008              | 16  |
| [144] | mam_072308x_PH_P8_HCT_15_C11.0.1.6201              | 16  |
| [145] | klc_082108x_PH_P7a_CaCo2_G15_1.0.1.4080            | 16  |
| [146] | klc_090308x_PH_P7a_SW480_J15.0.1.4920              | 16  |

seq

<DNAStrngSet>

|       |                    |              |
|-------|--------------------|--------------|
| [1]   | GAGCTAGAAGCTTTGTA  | CTTCCTTAGG   |
| [2]   | GAGCTAGAAGCTTTGTA  | CTTCCTTAGG   |
| [3]   | GAGCTAGAAGCTTTGTA  | CTTCCTTAGG   |
| [4]   | GAGCTAGAAGCTTTGTA  | CTTCCTTAGG   |
| [5]   | GAGCTAGAAGCTTTGTA  | CTTCCTTAGG   |
| ...   | ...                | ...          |
| [142] | CCTGTAGGAATCCTCTAT | TGTTGGATCATA |
| [143] | CCTGTAGGAATCCTCTAT | TGTTGGATCATA |
| [144] | CAAGGCACTCTTGCCTAC | GCACAGCTCCA  |
| [145] | CTTGCCCTACGCCACCAG | CTCCA        |
| [146] | CTTGCCCTACGCCAACAG | CTCCA        |

|     | NH        | XL        | XP          | XR          |
|-----|-----------|-----------|-------------|-------------|
|     | <integer> | <integer> | <character> | <character> |
| [1] | 1         | 1         | ELEALYFLR   | ELEALYFLR   |
| [2] | 1         | 1         | ELEALYFLR   | ELEALYFLR   |
| [3] | 1         | 1         | ELEALYFLR   | ELEALYFLR   |
| [4] | 1         | 1         | ELEALYFLR   | ELEALYFLR   |
| [5] | 1         | 1         | ELEALYFLR   | ELEALYFLR   |

|       | NH | XL | XP                 | XR                 |
|-------|----|----|--------------------|--------------------|
| [142] | 6  | 1  | YDPTIEDSYR         | YDPTIEDSYR         |
| [143] | 6  | 1  | YDPTIEDSYR         | YDPTIEDSYR         |
| [144] | 1  | 1  | TEYKLVVVGAGDVGKSAL | TEYKLVVVGAGGVGKSAL |
| [145] | 4  | 1  | LVVVGAGGVGK        | LVVVGAGGVGK        |
| [146] | 1  | 1  | LVVVGAVGVGK        | LVVVGAGGVGK        |

|       | XS        | XQ        | XC        | XA          | XM          |
|-------|-----------|-----------|-----------|-------------|-------------|
|       | <numeric> | <logical> | <integer> | <character> | <character> |
| [1]   | 39.1477   | <NA>      | 2         | 0           | NA          |
| [2]   | 39.2369   | <NA>      | 2         | 0           | NA          |
| [3]   | 45.3205   | <NA>      | 2         | 0           | NA          |
| [4]   | 50.0433   | <NA>      | 2         | 0           | NA          |
| [5]   | 52.9704   | <NA>      | 2         | 0           | NA          |
| ...   | ...       | ...       | ...       | ...         | ...         |
| [142] | 49.2137   | <NA>      | 2         | 0           | NA          |



```

[143] 32.8392 <NA> 2 0 NA
[144] 41.6893 <NA> 4 0 NA
[145] 49.9949 <NA> 2 0 NA
[146] 45.6955 <NA> 2 0 NA

```

```

      XN      XT      XG
<integer> <integer> <character>
[1]      0      2      N
[2]      0      2      N
[3]      0      2      N
[4]      0      2      N
[5]      0      2      N
...      ...      ...      ...
[142]     0      2      N
[143]     0      2      N
[144]     2      0      V
[145]     0      2      N
[146]     0      2      V

```

-----

seqinfo: 217 sequences from an unspecified genome

> SummarizeproBAM(glan\_proBAM)

```

Spectra
146
PSM
146
Distinct_peptide
14
Distinct_peptide_seq
12
Peptide map to unique genomic location
12
Peptides within exon
9
Peptides spanning exons
3
Peptides spanning 2 exons
3
Peptides spanning 3 exons
NA
Peptides spanning > 3 exons
0
Peptide map to 2 genomic location
NA
Peptide map to 3 genomic location
NA

```

```

Peptide map to 4-10 genomic location
      NA
Peptide map to >10 genomic location
      NA

```

### 3.1.2 Sequence coverage analysis of proteomics data

While existing proteomics data formats only report sequence coverage for individual proteins, the *proBAM* format contains genome information, thereby allowing *proBAMtools* to provide sequence coverage reports at the genome, chromosome, and individual gene levels. The function `CDScov` is used to calculate sequence coverage at the whole genome or chromosome level.

```

> txdb <- loadDb(system.file("extdata/anno_ensembl", "txdb.sqlite",
+   package="proBAMtools"))
> CDScov(glan_proBAM, txdb, bychr=FALSE)

[1] 0.1579892

> CDScov(glan_proBAM, txdb, bychr=TRUE)

```

|       |       |       |       |           |       |       |
|-------|-------|-------|-------|-----------|-------|-------|
| chr1  | chr2  | chr3  | chr4  | chr5      | chr6  | chr7  |
| NaN   | NaN   | NaN   | NaN   | NaN       | NaN   | NaN   |
| chr8  | chr9  | chr10 | chr11 | chr12     | chr13 | chr14 |
| NaN   | NaN   | NaN   | NaN   | 0.1579892 | NaN   | NaN   |
| chr15 | chr16 | chr17 | chr18 | chr19     | chr20 | chr21 |
| NaN   | NaN   | NaN   | NaN   | NaN       | NaN   | NaN   |
| chr22 | chrX  | chrY  |       |           |       |       |
| NaN   | NaN   | NaN   |       |           |       |       |

And function `GeneCDScov` is provided to calculate the sequence coverage for individual genes.

```

> GeneCDScov(glan_proBAM, txdb)

ENSG00000133703 ENSG00000205707
      0.33474576      0.02288136

```

## 3.2 Proteomics data assembly

### 3.2.1 Parsimony

In a typical proteomics study, parsimony analysis is usually used to derive a minimal protein list that is sufficient to explain the observed peptide identification. We provide a function `proBAM2pepBAM` to convert a PSMs based *proBAM* file to the peptide based *proBAM* file.

```

> pepBAM <- proBAM2pepBAM(glan_proBAM)
> pepBAM

```

GAlignments object with 16 alignments and 13 metadata columns:

|      | seqnames | strand | cigar        | qwidth    | start     | end       |
|------|----------|--------|--------------|-----------|-----------|-----------|
|      | <Rle>    | <Rle>  | <character>  | <integer> | <integer> | <integer> |
| [1]  | chr12    | +      | 27M          | 27        | 25357166  | 25357192  |
| [2]  | chr12    | -      | 33M15702N3M  | 36        | 25362813  | 25378550  |
| [3]  | chr12    | -      | 33M15702N3M  | 36        | 25362813  | 25378550  |
| [4]  | chr12    | -      | 30M          | 30        | 25368462  | 25368491  |
| [5]  | chr12    | -      | 30M          | 30        | 25368462  | 25368491  |
| ...  | ...      | ...    | ...          | ...       | ...       | ...       |
| [12] | chr12    | -      | 12M17861N18M | 30        | 25380335  | 25398225  |
| [13] | chr12    | -      | 12M17861N18M | 30        | 25380335  | 25398225  |
| [14] | chr12    | -      | 54M          | 54        | 25398262  | 25398315  |
| [15] | chr12    | -      | 33M          | 33        | 25398271  | 25398303  |
| [16] | chr12    | -      | 33M          | 33        | 25398271  | 25398303  |

|      | width     | njunc     | qwidth    | njunc     | flag      |
|------|-----------|-----------|-----------|-----------|-----------|
|      | <integer> | <integer> | <integer> | <integer> | <integer> |
| [1]  | 27        | 0         | 27        | 0         | 0         |
| [2]  | 15738     | 1         | 36        | 1         | 16        |
| [3]  | 15738     | 1         | 36        | 1         | 16        |
| [4]  | 30        | 0         | 30        | 0         | 16        |
| [5]  | 30        | 0         | 30        | 0         | 16        |
| ...  | ...       | ...       | ...       | ...       | ...       |
| [12] | 17891     | 1         | 30        | 1         | 16        |
| [13] | 17891     | 1         | 30        | 1         | 16        |
| [14] | 54        | 0         | 54        | 0         | 16        |
| [15] | 33        | 0         | 33        | 0         | 16        |
| [16] | 33        | 0         | 33        | 0         | 16        |

|      | seq                                                      |
|------|----------------------------------------------------------|
|      | <character>                                              |
| [1]  | GAGCTAGAAGCTTTGTACTTCCTTAGG                              |
| [2]  | TCGAACTAATGTATAGAAGGCATCATCAACACCCTG                     |
| [3]  | TCGAACTAATGTATAGAAGGCATCATCAACACCCTG                     |
| [4]  | CCTCACCAATGTATAAAAAGCATCCTCCAC                           |
| [5]  | CCTCACCAATGTATAAAAAGCATCCTCCAC                           |
| ...  | ...                                                      |
| [12] | CCTGTAGGAATCCTCTATTGTTGGATCATA                           |
| [13] | CCTGTAGGAATCCTCTATTGTTGGATCATA                           |
| [14] | CAAGGCACTCTTGCCTACGTCACCAGCTCCAACCTACCACAAGTTTATATTTCAGT |
| [15] | CTTGCCTACGCCACCAGCTCCAACCTACCACAAG                       |
| [16] | CTTGCCTACGCCAACAGCTCCAACCTACCACAAG                       |

|     | XA          | NH        | XP           | XR           |
|-----|-------------|-----------|--------------|--------------|
|     | <character> | <integer> | <character>  | <character>  |
| [1] | 0           | 1         | ELEALYFLR    | ELEALYFLR    |
| [2] | 0           | 1         | QGVDDAFYTLVR | QGVDDAFYTLVR |
| [3] | 0           | 1         | QGVDDAFYTLVR | QGVDDAFYTLVR |

```

[4]           0           4           VEDAFYTLVR           VEDAFYTLVR
[5]           0           4           VEDAFYTLVR           VEDAFYTLVR
...           ...           ...           ...           ...
[12]          0           6           YDPTIEDSYR           YDPTIEDSYR
[13]          0           6           YDPTIEDSYR           YDPTIEDSYR
[14]          0           1 TEYKLVVVGAGDVGKSAL TEYKLVVVGAGGVGKSAL
[15]          0           4           LVVVGAGGVGK           LVVVGAGGVGK
[16]          0           1           LVVVGAVGVGK           LVVVGAGGVGK

                XC                XM                XN                XT                XG
                <integer>         <character> <integer> <integer> <character>
[1]             2                 -                0                2                N
[2]             2                 -                0                2                N
[3]             2 1;111.0320285114             0                2                N
[4]             2                 -                0                1                N
[5]             2                 -                0                2                N
...           ...           ...           ...           ...           ...
[12]            2                 -                0                2                N
[13]            2                 -                0                1                N
[14]            4                 -                2                0                V
[15]            2                 -                0                2                N
[16]            2                 -                0                2                V
-----

```

```
seqinfo: 1 sequence from an unspecified genome; no seqlengths
```

In function `pepBAM_parsimony`, a previously published parsimony procedure is used to generate a minimal list of identified proteins or genes. The procedure relies on bipartite graph modeling. What distinguishes the `proBAM` approach from the previous approach is the utilization of genomic location information in the construction of the bipartite graph. Specifically, the `proBAM`-based approach can relate peptides to different types of genomic elements such as exons, transcript isoforms, or genes based on their overlapping relationship on the genome. Consequently, inference can be made at both protein level and gene level. Moreover, inference can be made based on different versions of genome annotations.

```

> #gene level parsimony
> cdsByGe <- cdsBy(txdb, "gene", use.names=FALSE)
> gegp <- pepBAM_parsimony(pepBAM, cdsByGe)
> gegp

```

```

Group
[1,] "ENSG00000205707"
[2,] "ENSG00000133703"
Peptides
[1,] "ELEALYFLR 2 -_pep"
[2,] "QGVDDAFYTLVR 2 -_pep:QGVDDAFYTLVR 2 1;111.0320285114_pep:VEDAFYTLVR 2 -_pep:QAQDLAR 1 1;111.0320285114_pep"
#inGroup #ofPeptide

```

```
[1,] "1"      "1"
[2,] "1"      "13"
```

```
> #protein level parsimony
> cdsByTx <- cdsBy(txdb, "tx", use.names=TRUE)
> progp <- pepBAM_parsimony(pepBAM, cdsByTx)
> progp
```

```
      Group
[1,] "ENST00000381356:ENST00000556351:ENST00000556885:ENST00000556927:ENST00000557540"
[2,] "ENST00000311936"
[3,] "ENST00000256078"
      Peptides
[1,] "ELEALYFLR 2 -_pep"
[2,] "QGVDDAFYTLVR 2 -_pep:QGVDDAFYTLVR 2 1;111.0320285114_pep:QAQDLAR 1 1;111.0320285114_pep:DS
[3,] "VEDAFYTLVR 2 -_pep:QAQDLAR 1 1;111.0320285114_pep:DSEDVPMVLVGNKCDLPSR 3 7;147.0353996062;1
      #inGroup #ofPeptide
[1,] "5"      "1"
[2,] "1"      "12"
[3,] "1"      "11"
```

### 3.2.2 Generate spectra count table for proteomics data

*proBAMtools* generates count tables on the basis of genomic structure of the genes. Both spectral count and peptide count tables are provided at protein isoform- and gene-levels, respectively, and both overall counts and gene-specific or isoform-specific counts are reported. The overall spectral count for a gene or an isoform respectively sums up all PSMs associated with the gene or the isoform, whereas the gene-specific or isoform-specific spectral count, respectively, sums up only PSMs associated specifically with the gene or the isoform. The same conditions also apply to peptide counting. Count data are provided for individual genes and proteins. By integrating these data with the minimal protein or gene group lists resulting from the parsimony analysis, count tables can be generated for the confidently identified genes or proteins.

```
> ##gene level peptide count
> cdsByGe <- cdsBy(txdb, "gene", use.names=FALSE)
> proBAMCount(pepBAM, cdsByGe)
```

|                 | specific | overall |
|-----------------|----------|---------|
| ENSG00000133703 | 8        | 15      |
| ENSG00000205707 | 1        | 1       |

```
> ##gene level spectra count
> proBAMCount(glan_proBAM, cdsByGe)
```

|                 | specific | overall |
|-----------------|----------|---------|
| ENSG00000133703 | 78       | 139     |
| ENSG00000205707 | 7        | 7       |

```

> ##protein level peptide count
> cdsByTx <- cdsBy(txdb, "tx", use.names=TRUE)
> proBAMCount(pepBAM, cdsByTx)

```

|                 | specific | overall |
|-----------------|----------|---------|
| ENST00000256078 | 0        | 13      |
| ENST00000311936 | 2        | 13      |
| ENST00000381356 | 0        | 1       |
| ENST00000553788 | 0        | 0       |
| ENST00000554266 | 0        | 0       |
| ENST00000555151 | 0        | 0       |
| ENST00000555711 | 0        | 0       |
| ENST00000556131 | 0        | 3       |
| ENST00000556198 | 0        | 0       |
| ENST00000556351 | 0        | 1       |
| ENST00000556402 | 0        | 0       |
| ENST00000556885 | 0        | 1       |
| ENST00000556927 | 0        | 1       |
| ENST00000557334 | 0        | 3       |
| ENST00000557540 | 0        | 1       |

```

> ##protein level spectra count
> proBAMCount(glan_proBAM, cdsByTx)

```

|                 | specific | overall |
|-----------------|----------|---------|
| ENST00000256078 | 0        | 85      |
| ENST00000311936 | 54       | 124     |
| ENST00000381356 | 0        | 7       |
| ENST00000553788 | 0        | 0       |
| ENST00000554266 | 0        | 0       |
| ENST00000555151 | 0        | 0       |
| ENST00000555711 | 0        | 0       |
| ENST00000556131 | 0        | 3       |
| ENST00000556198 | 0        | 0       |
| ENST00000556351 | 0        | 7       |
| ENST00000556402 | 0        | 0       |
| ENST00000556885 | 0        | 7       |
| ENST00000556927 | 0        | 7       |
| ENST00000557334 | 0        | 3       |
| ENST00000557540 | 0        | 7       |

### 3.3 Proteomics data integration

#### 3.3.1 Switch annotation

Using genomic sequence as a common reference, proBAM provides a natural solution for proteomics data integration. PSMs align with the genome regardless of the protein database used in the pro-

teomics study, thereby allowing flexible switching between different gene annotation schemes. We developed a function `Switchanno`, that use a three-step procedure to switch gene annotation scheme for proBAM files, which includes: 1) Removing peptides with any region out of the CDSs of the new annotation scheme; 2) Removing peptides with any region inconsistent with the gene structure of the new scheme; 3) Removing peptides that are out of frame in the new scheme. Accordingly, proteomics datasets generated by searching against different databases can be converted to the same gene annotation scheme for integration.

```
> new_annotation_path <- system.file("extdata/anno_refseq/",
+   package="proBAMtools")
> Switchanno(glan_proBAM, new_annotation_path)
```

GAlignments object with 139 alignments and 15 metadata columns:

|       | seqnames | strand | cigar       | qwidth    | start     | end       |
|-------|----------|--------|-------------|-----------|-----------|-----------|
|       | <Rle>    | <Rle>  | <character> | <integer> | <integer> | <integer> |
| [1]   | chr12    | -      | 33M15702N3M | 36        | 25362813  | 25378550  |
| [2]   | chr12    | -      | 33M15702N3M | 36        | 25362813  | 25378550  |
| [3]   | chr12    | -      | 33M15702N3M | 36        | 25362813  | 25378550  |
| [4]   | chr12    | -      | 33M15702N3M | 36        | 25362813  | 25378550  |
| [5]   | chr12    | -      | 33M15702N3M | 36        | 25362813  | 25378550  |
| ...   | ...      | ...    | ...         | ...       | ...       | ...       |
| [135] | chr12    | -      | 45M         | 45        | 25378647  | 25378691  |
| [136] | chr12    | -      | 39M         | 39        | 25378647  | 25378685  |
| [137] | chr12    | -      | 54M         | 54        | 25398262  | 25398315  |
| [138] | chr12    | -      | 33M         | 33        | 25398271  | 25398303  |
| [139] | chr12    | -      | 33M         | 33        | 25398271  | 25398303  |

  

|       | width     | njunc     |     |
|-------|-----------|-----------|-----|
|       | <integer> | <integer> |     |
| [1]   | 15738     | 1         |     |
| [2]   | 15738     | 1         |     |
| [3]   | 15738     | 1         |     |
| [4]   | 15738     | 1         |     |
| [5]   | 15738     | 1         |     |
| ...   | ...       | ...       | ... |
| [135] | 45        | 0         |     |
| [136] | 39        | 0         |     |
| [137] | 54        | 0         |     |
| [138] | 33        | 0         |     |
| [139] | 33        | 0         |     |

  

|     | qname                                   | flag      |
|-----|-----------------------------------------|-----------|
|     | <character>                             | <integer> |
| [1] | k1c_080408x_PH_P8_CaCo2_G08.0.1.6578    | 16        |
| [2] | k1c_080408x_PH_P8_CaCo2_G08.0.1.6645    | 16        |
| [3] | k1c_080408x_PH_P8_CaCo2_G08.0.1.7102    | 16        |
| [4] | k1c_080408x_PH_P8_CaCo2_G08.0.1.7110    | 16        |
| [5] | k1c_082108x_PH_P7a_CaCo2_G08_1.0.1.6905 | 16        |

```

...
[135] klc_090308x_PH_P7a_SW480_J15.0.1.5465 16
[136] mam_20081229x_P10_SW480_J03.0.1.5910 16
[137] mam_072308x_PH_P8_HCT_15_C11.0.1.6201 16
[138] klc_082108x_PH_P7a_CaCo2_G15_1.0.1.4080 16
[139] klc_090308x_PH_P7a_SW480_J15.0.1.4920 16

```

seq

<DNAStrngSet>

```

[1] TCGAACTAATGTATAGAAGGCATCATCAACACCCTG
[2] TCGAACTAATGTATAGAAGGCATCATCAACACCCTG
[3] TCGAACTAATGTATAGAAGGCATCATCAACACCCTG
[4] TCGAACTAATGTATAGAAGGCATCATCAACACCCTG
[5] TCGAACTAATGTATAGAAGGCATCATCAACACCCTG

```

```

...
[135] TTTATTTCTACTAGGACCATAGGTACATCTTCAGAGTCCTTAAC
[136] TTTATTTCTACTAGGACCATAGGTACATCTTCAGAGTC
[137] CAAGGCACTCTTGCCTACGTCACCAGCTCCAACACCACAAGTTTATATTCAGT
[138] CTTGCCTACGCCACCAGCTCCAACACCACAAG
[139] CTTGCCTACGCCAACAGCTCCAACACCACAAG

```

|     | NH        | XL        | XP           | XR           |
|-----|-----------|-----------|--------------|--------------|
|     | <integer> | <integer> | <character>  | <character>  |
| [1] | 1         | 1         | QGVDDAFYTLVR | QGVDDAFYTLVR |
| [2] | 1         | 1         | QGVDDAFYTLVR | QGVDDAFYTLVR |
| [3] | 1         | 1         | QGVDDAFYTLVR | QGVDDAFYTLVR |
| [4] | 1         | 1         | QGVDDAFYTLVR | QGVDDAFYTLVR |
| [5] | 1         | 1         | QGVDDAFYTLVR | QGVDDAFYTLVR |

| [135] | 1 | 1 | VKDSVDVPMVLVGNK    | VKDSVDVPMVLVGNK    |
|-------|---|---|--------------------|--------------------|
| [136] | 1 | 1 | DSEDVPMVLVGNK      | DSEDVPMVLVGNK      |
| [137] | 1 | 1 | TEYKLVVVGAGDVGKSAL | TEYKLVVVGAGGVGKSAL |
| [138] | 4 | 1 | LVVVGAGGVGK        | LVVVGAGGVGK        |
| [139] | 1 | 1 | LVVVGAVGVGK        | LVVVGAGGVGK        |

|       | XS        | XQ        | XC        | XA                 | XM          |
|-------|-----------|-----------|-----------|--------------------|-------------|
|       | <numeric> | <logical> | <integer> | <character>        | <character> |
| [1]   | 39.3926   | <NA>      | 2         | 0                  | NA          |
| [2]   | 41.2553   | <NA>      | 2         | 0                  | NA          |
| [3]   | 52.9468   | <NA>      | 2         | 0 1;111.0320285114 |             |
| [4]   | 45.3983   | <NA>      | 2         | 0 1;111.0320285114 |             |
| [5]   | 59.9704   | <NA>      | 2         | 0                  | NA          |
| [135] | 48.6780   | <NA>      | 3         | 0                  | NA          |
| [136] | 57.9800   | <NA>      | 2         | 0 7;147.0353996062 |             |
| [137] | 41.6893   | <NA>      | 4         | 0                  | NA          |
| [138] | 49.9949   | <NA>      | 2         | 0                  | NA          |
| [139] | 45.6955   | <NA>      | 2         | 0                  | NA          |



|       | XN        | XT        | XG          |
|-------|-----------|-----------|-------------|
|       | <integer> | <integer> | <character> |
| [1]   | 0         | 2         | N           |
| [2]   | 0         | 2         | N           |
| [3]   | 0         | 2         | N           |
| [4]   | 0         | 2         | N           |
| [5]   | 0         | 2         | N           |
| ...   | ...       | ...       | ...         |
| [135] | 1         | 2         | N           |
| [136] | 0         | 2         | N           |
| [137] | 2         | 0         | V           |
| [138] | 0         | 2         | N           |
| [139] | 0         | 2         | V           |

-----

seqinfo: 24 sequences from an unspecified genome

```
> length(glan_proBAM)
```

```
[1] 146
```

```
> length(Switchanno(glan_proBAM, new_annotation_path))
```

```
[1] 139
```

### 3.3.2 Multiple data sets integration

proBAM files are generated from individual studies using *proBAMr* based on user-specified PSM FDRs. Because PSMs in all resulting proBAM files are mapped to the genome and thus aligned in the same coordinate system, they can be easily combined into one proBAM file. All PSMs in this combined proBAM file can be re-annotated according to a user-specified gene annotation scheme as described above.

## 4 Session Information

```
R version 3.1.1 (2014-07-10)
```

```
Platform: x86_64-unknown-linux-gnu (64-bit)
```

```
locale:
```

```
[1] LC_CTYPE=en_US.UTF-8      LC_NUMERIC=C
[3] LC_TIME=en_US.UTF-8      LC_COLLATE=en_US.UTF-8
[5] LC_MONETARY=en_US.UTF-8  LC_MESSAGES=en_US.UTF-8
[7] LC_PAPER=en_US.UTF-8     LC_NAME=C
[9] LC_ADDRESS=C              LC_TELEPHONE=C
[11] LC_MEASUREMENT=en_US.UTF-8 LC_IDENTIFICATION=C
```

```
attached base packages:
```

```
[1] stats4    parallel  stats      graphics  grDevices  utils
[7] datasets  methods  base
```

other attached packages:

```
[1] proBAMtools_0.99.0      Matrix_1.2-2
[3] igraph_1.0.1            GenomicFeatures_1.18.7
[5] GenomicAlignments_1.2.2 Rsamtools_1.18.3
[7] Biostrings_2.34.1      XVector_0.6.0
[9] GenomicRanges_1.18.4   proBAMr_1.3.2
[11] AnnotationDbi_1.28.2    GenomeInfoDb_1.2.5
[13] Biobase_2.26.0         IRanges_2.0.1
[15] S4Vectors_0.4.0        BiocGenerics_0.12.1
```

loaded via a namespace (and not attached):

```
[1] base64enc_0.1-3      BatchJobs_1.6      BBmisc_1.9
[4] BiocParallel_1.0.3  biomaRt_2.22.0    bitops_1.0-6
[7] brew_1.0-6          checkmate_1.6.2    codetools_0.2-14
[10] DBI_0.3.1           digest_0.6.8       fail_1.2
[13] foreach_1.4.2       grid_3.1.1         iterators_1.0.7
[16] lattice_0.20-33     magrittr_1.5       RCurl_1.95-4.7
[19] RSQLite_1.0.0       rtracklayer_1.26.3 sendmailR_1.2-1
[22] stringi_0.5-5       stringr_1.0.0      tools_3.1.1
[25] XML_3.98-1.3        zlibbioc_1.12.0
```
